# Supplementary material for: Application of Nanopore Sequencing (MinION) for the Analysis of Bacteriome and Resistome of Bean Sprouts
Source: MDPI journal article supplement (doi:10.3390/microorganisms9050937), 2021-04-27
Supplement: s1 [file s1]

**Table S1.** Family diversity of bean sprouts – other fourteen abundant families (detected only from <0.5 % to 4 %)

| Family/ Genus                          | Sample A (0 h)<br>12 441 | Sample A (48 h)<br>209 702 | Sample B (0 h)<br>13 728 | Sample B (48 h)<br>378 082 |
|----------------------------------------|--------------------------|----------------------------|--------------------------|----------------------------|
| <b><i>Leuconostocaceae</i> (G+)</b>    | <b>0 (0 %)</b>           | <b>6 (&lt;0.5 %)</b>       | <b>171 (2 %)</b>         | <b>13 170 (4 %)</b>        |
| <i>Leuconostoc</i>                     | 0 %                      | <0.5%                      | <0.5%                    | 1%                         |
| <i>Weissella</i>                       | 0 %                      | <0.5%                      | 1%                       | 3%                         |
| <b><i>Pectobacteriaceae</i> (G-)</b>   | <b>3 (&lt;0.5 %)</b>     | <b>307 (&lt;0.5 %)</b>     | <b>30 (&lt;0.5 %)</b>    | <b>8 407 (2 %)</b>         |
| <i>Pectobacterium</i>                  | 0 %                      | <0.5%                      | <0.5%                    | 2%                         |
| <i>Dickeya</i>                         | <0.5 %                   | <0.5%                      | <0.5%                    | <0.5%                      |
| <b><i>Yersiniaceae</i> (G-)</b>        | <b>1 (&lt;0.5 %)</b>     | <b>411 (&lt;0.5 %)</b>     | <b>98 (1 %)</b>          | <b>5 577 (2 %)</b>         |
| <i>Yersinia</i>                        | 0 %                      | <0.5%                      | <0.5%                    | <0.5%                      |
| <i>Serratia</i>                        | <0.5 %                   | <0.5%                      | 1%                       | 1%                         |
| <b><i>Comamonadaceae</i> (G-)</b>      | <b>1 (&lt;0.5 %)</b>     | <b>4 764 (2 %)</b>         | <b>7 (&lt;0.5 %)</b>     | <b>5 259 (1 %)</b>         |
| <i>Comamonas</i>                       | <0.5 %                   | 1%                         | <0.5%                    | 1%                         |
| <i>Delftia</i>                         | 0 %                      | 1%                         | <0.5%                    | <0.5%                      |
| <b><i>Campylobacteriaceae</i> (G-)</b> | <b>1 (&lt;0.5 %)</b>     | <b>3 604 (2 %)</b>         | <b>4 (&lt;0.5 %)</b>     | <b>56 (&lt;0.5 %)</b>      |
| <i>Campylobacter</i>                   | <0.5 %                   | <0.5%                      | <0.5%                    | <0.5%                      |
| <i>Arcobacter</i>                      | 0 %                      | 2%                         | <0.5%                    | <0.5%                      |
| <b><i>Aeromonadaceae</i> (G-)</b>      | <b>0 (0 %)</b>           | <b>808 (&lt;0.5 %)</b>     | <b>2 (&lt;0.5 %)</b>     | <b>3 968 (1 %)</b>         |
| <i>Aeromonas</i>                       | 0 %                      | <0.5%                      | <0.5%                    | 1%                         |
| <b><i>Chromobacteriaceae</i> (G-)</b>  | <b>1 (&lt;0.5 %)</b>     | <b>844 (&lt;0.5 %)</b>     | <b>2 (&lt;0.5 %)</b>     | <b>166 (&lt;0.5 %)</b>     |
| <i>Chromobacterium</i>                 | 0 %                      | <0.5%                      | 0%                       | <0.5%                      |
| <i>Laribacter</i>                      | 0 %                      | <0.5%                      | <0.5%                    | <0.5%                      |
| <b><i>Burkholderiaceae</i> (G-)</b>    | <b>2 (&lt;0.5 %)</b>     | <b>1 020 (1 %)</b>         | <b>8 (&lt;0.5 %)</b>     | <b>1 125 (&lt;0.5 %)</b>   |
| <i>Burkholderia</i>                    | <0.5 %                   | <0.5%                      | <0.5%                    | <0.5%                      |
| <i>Cupriavidus</i>                     | <0.5 %                   | <0.5%                      | <0.5%                    | <0.5%                      |
| <b><i>Xanthomonadaceae</i> (G-)</b>    | <b>2 (&lt;0.5 %)</b>     | <b>542 (&lt;0.5 %)</b>     | <b>4 (&lt;0.5 %)</b>     | <b>991 (&lt;0.5 %)</b>     |
| <i>Xanthomonas</i>                     | <0.5 %                   | <0.5%                      | 0%                       | <0.5%                      |
| <i>Lysobacter</i>                      | 0 %                      | <0.5%                      | <0.5%                    | <0.5%                      |
| <b><i>Neisseriaceae</i> (G-)</b>       | <b>0 (&lt;0.5 %)</b>     | <b>34 (&lt;0.5 %)</b>      | <b>0 (&lt;0.5 %)</b>     | <b>41 (&lt;0.5 %)</b>      |
| <i>Neisseria</i>                       | 0 %                      | <0.5%                      | 0%                       | <0.5%                      |
| <b><i>Enterococcaceae</i> (G+)</b>     | <b>1 (&lt;0.5 %)</b>     | <b>325 (&lt;0.5 %)</b>     | <b>6 (&lt;0.5 %)</b>     | <b>1 409 (&lt;0.5 %)</b>   |

|                                     |                      |                        |                      |                        |
|-------------------------------------|----------------------|------------------------|----------------------|------------------------|
| <i>Enterococcus</i>                 | 0 %                  | <0.5%                  | <0.5%                | <0.5%                  |
| <i>Vagococcus</i>                   | 0 %                  | <0.5%                  | <0.5%                | <0.5%                  |
| <b><i>Morganellaceae (G-)</i></b>   | <b>1 (&lt;0.5 %)</b> | <b>68 (&lt;0.5 %)</b>  | <b>5 (&lt;0.5 %)</b> | <b>132 (&lt;0.5 %)</b> |
| <i>Morganella</i>                   | 0 %                  | <0.5%                  | 0%                   | <0.5%                  |
| <i>Proteus</i>                      | 0 %                  | <0.5%                  | <0.5%                | <0.5%                  |
| <i>Providencia</i>                  | 0 %                  | <0.5%                  | <0.5%                | <0.5%                  |
| <b><i>Lactobacillaceae (G+)</i></b> | <b>2 (&lt;0.5 %)</b> | <b>89 (&lt;0.5 %)</b>  | <b>5 (&lt;0.5 %)</b> | <b>427 (&lt;0.5 %)</b> |
| <i>Lactobacillus</i>                | <0.5 %               | <0.5%                  | <0.5%                | <0.5%                  |
| <i>Pediococcus</i>                  | <0.5%                | <0.5%                  | 0%                   | <0.5%                  |
| <b><i>Hafniaceae (G-)</i></b>       | <b>1 (&lt;0.5 %)</b> | <b>147 (&lt;0.5 %)</b> | <b>7 (&lt;0.5 %)</b> | <b>136 (&lt;0.5 %)</b> |
| <i>Hafnia</i>                       | 0%                   | <0.5%                  | <0.5%                | <0.5%                  |
| <b>Others families</b>              | <b>1%</b>            | <b>3%</b>              | <b>2%</b>            | <b>3%</b>              |
